# Supplementary material
Source: PubMed Central journal article supplement (PMC3524387)
Supplement: NIHMS414112-supplement-Supp_FigureS1-S3_TableS1.pdf [file NIHMS414112-supplement-Supp_FigureS1-S3_TableS1.pdf]

Table S1. Oligonucleotides used in this study

Transposon primer1: TACGGCGAAGGATCACTCATGG  
Transposon primer2: TATATATTTCTGCTTCGCTAGG  
AA502: CGCCCGGGTTGCTCTTTATTTGCTTTATTGTC  
AA505: AGCCCGGGCGCATGTTTGAAGAAGCAGGTTTCATAAAT  
AA508: GGGGACAAGTTTGTACAAAAAAGCAGGCTGGAAACAAGTGTAGCAAATTGGAAAG  
AA509: GGGGACCACTTTGTACAAGAAAGCTGGGTGTCAAACCTAAAAGTAGTGATTTCCGGATGT  
CAW430: GACACGGTCGCGAATATTTTAAACGGGTACTACGGAAGC  
CAW431: GCTTCCGTAGTACCCGTTTAAAATATTCGCGACCGTGTC  
CAW437: GGGGACAAGTTTGTACAAAAAAGCAGGCTGTGCTCGGGTCTAGTGACTG  
CAW438: GGGGACCACTTTGTACAAGAAAGCTGGGTGAGGTAGAGGCATCGCGAC  
DLS365: GGGGACAAGTTTGTACAAAAAAGCAGGCTGATTGGATTTCCGAGTATACAGC  
DLS366: CCCC GGATCCTCAGGGCGATTTATTGTTACC  
DLS367: CCCC GGATCCTTATTACACAAGTATGAAGCG  
DLS368: GGGGACCACTTTGTACAAGAAAGCTGGGTGGTCTGAAGTAAGTGAGCAAGACC

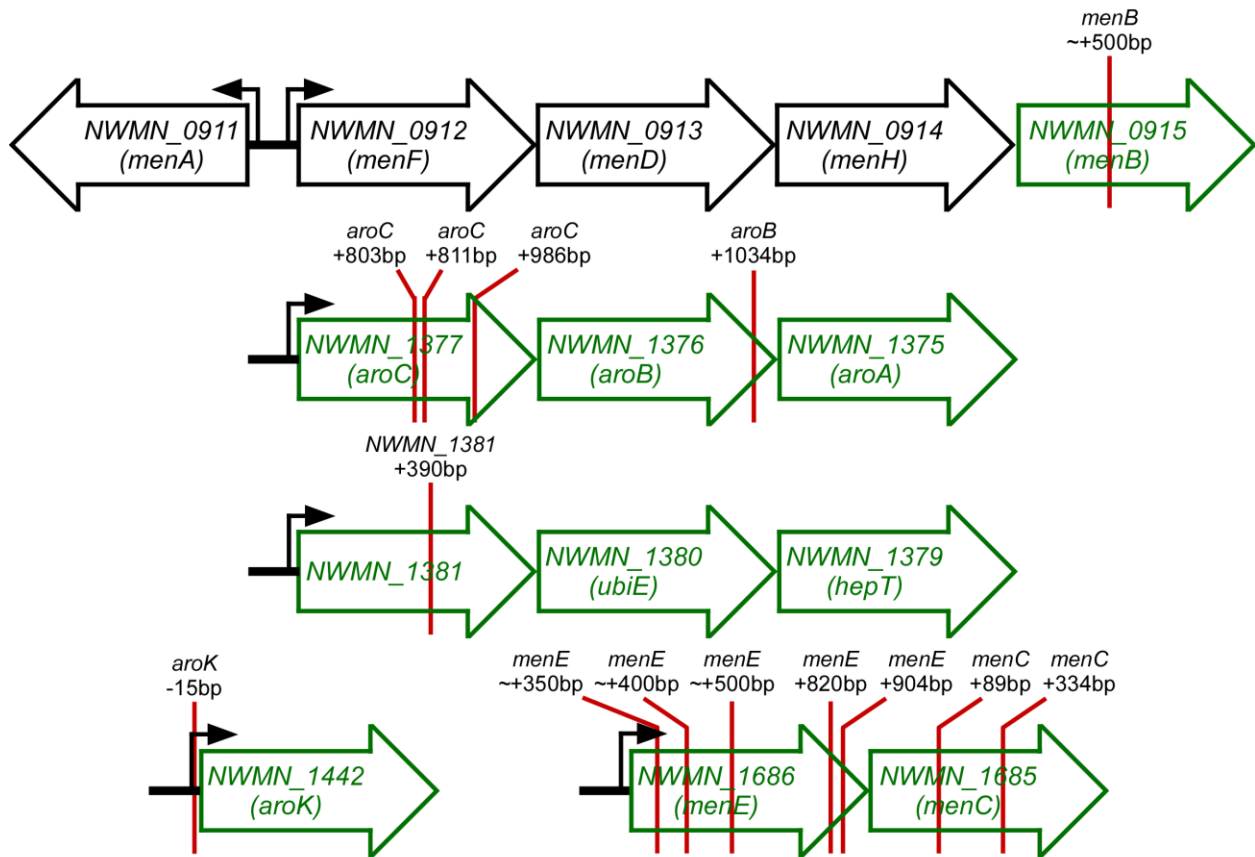

**Fig. S1. Operonic arrangement of the menaquinone (MK) biosynthesis genes disrupted in the transposon mutagenesis of *S. aureus*  $\Delta hrtA$ .** Transposon lesions are depicted in red, and the exact site of each lesion is denoted as base pairs relative to the translational start site of the gene containing the insertion. Genes that are disrupted by at least one of the identified transposon insertions are highlighted in green. Because the transposon insertion creates a polar deletion, all genes downstream of the lesion and located within the same operon are predicted to be disrupted by the transposon. The promoter elements and direction of transcription are depicted by the small black arrows.

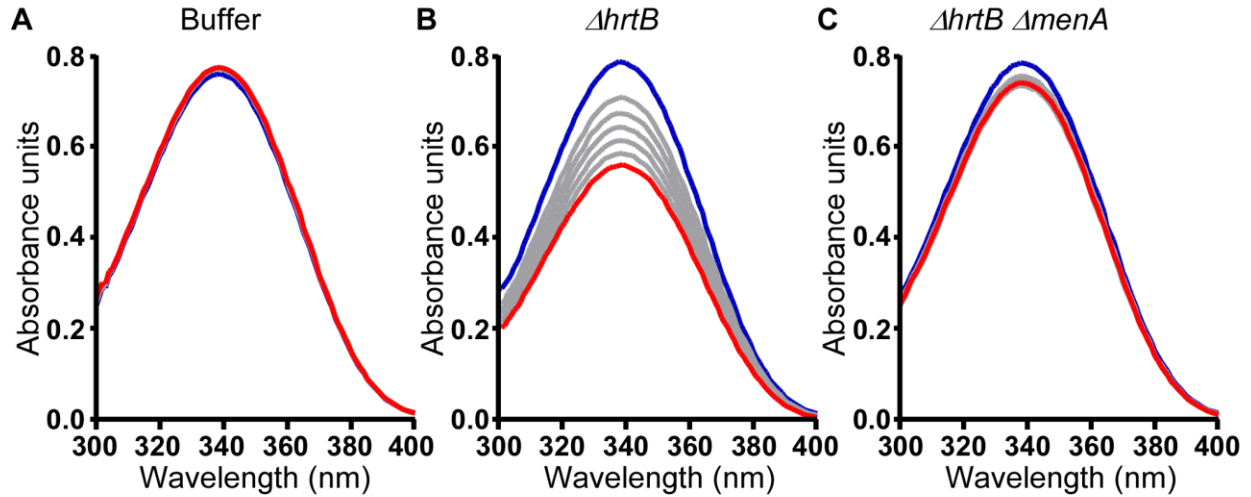

**Fig. S2. MK-deficient *S. aureus* strains do not respire and, therefore, do not oxidize NADH.** Inverted membranes were prepared from *S. aureus* strains by sonicating protoplasts suspended in 20 mM phosphate buffer pH 7.6. Samples were diluted to a final protein concentration of 0.25  $\mu\text{g}/\mu\text{L}$  and incubated in the presence of 150  $\mu\text{M}$  NADH. Spectral scans were taken of each sample at 5 minute intervals over the course of 30 minutes. NADH oxidation is measured by decrease in absorbance at 340 nm. Blue lines represent the initial spectral reading and red lines represent the 30 minute spectral reading. **A.** NADH does not degrade over the course of 30 minutes in buffer alone. **B.** Inverted membranes prepared from  $\Delta hrtB$  are capable of oxidizing significant levels of NADH. **C.** Inverted membranes prepared from  $\Delta hrtB \Delta menA$  do not significantly oxidize NADH over the course of 30 minutes. Data shown are representative of biological triplicates.

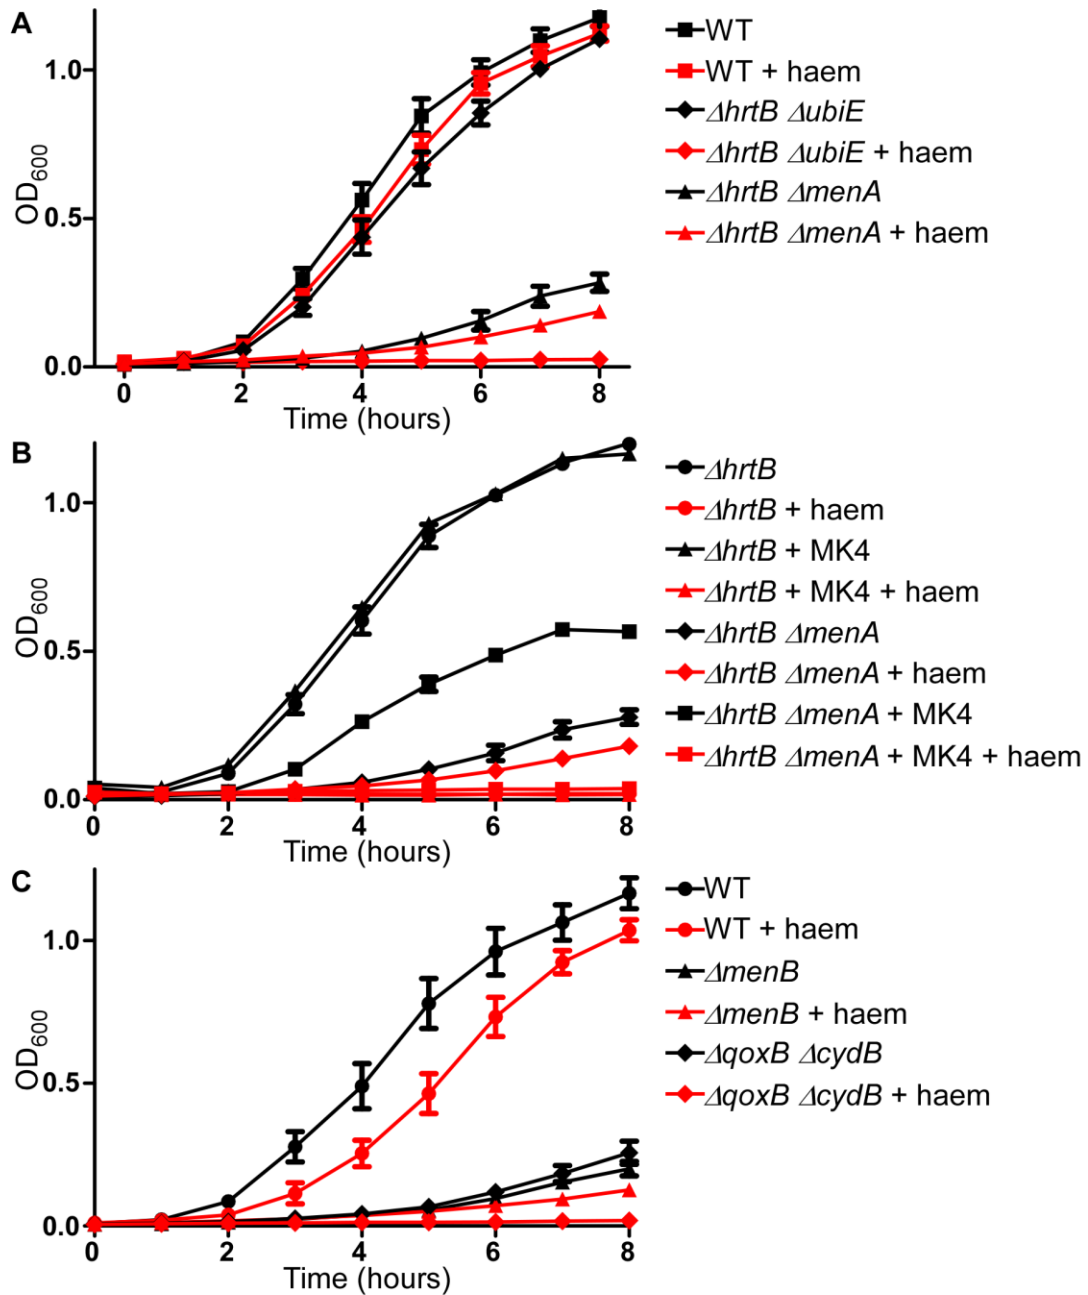

**Fig. S3. *S. aureus* growth curves.** **A.** The growth of *S. aureus* strains was monitored hourly by measuring optical density at 600 nm of cells cultured in TSB in the presence or absence of 6  $\mu$ M haem. **B.** The growth of *S. aureus* strains was monitored hourly for cells cultured in the presence or absence of 6  $\mu$ M haem and 12.5  $\mu$ M MK4. **C.** The growth of *S. aureus* strains was monitored hourly for cells cultured in the presence or absence of 10  $\mu$ M haem. Growth assays were performed at least three times on three separate days. Additionally, technical triplicates were performed on each day. Error bars represent SEM of the biological replicates.
